# Supplementary material
Source: publisher figshare collection journal article supplement (https://acs.figshare.com/ndownloader/files/31086607)
Supplement: Supplementary file 18 [file 31086607]

Archive with 14 entries (13 files):
- X-Ray submission/
- __MACOSX/._X-Ray submission
- X-Ray submission/CheckCIF combined.pdf
- __MACOSX/X-Ray submission/._CheckCIF combined.pdf
- X-Ray submission/Compound 4c.zip
- __MACOSX/X-Ray submission/._Compound 4c.zip
- X-Ray submission/Compound 4b.zip
- __MACOSX/X-Ray submission/._Compound 4b.zip
- X-Ray submission/Compound 5d.zip
- __MACOSX/X-Ray submission/._Compound 5d.zip
- X-Ray submission/Compound 5a.zip
- __MACOSX/X-Ray submission/._Compound 5a.zip
- X-Ray submission/Compound 5b.zip
- __MACOSX/X-Ray submission/._Compound 5b.zip
