# Supplementary material
Source: publisher figshare collection journal article supplement (https://acs.figshare.com/ndownloader/files/31086607)

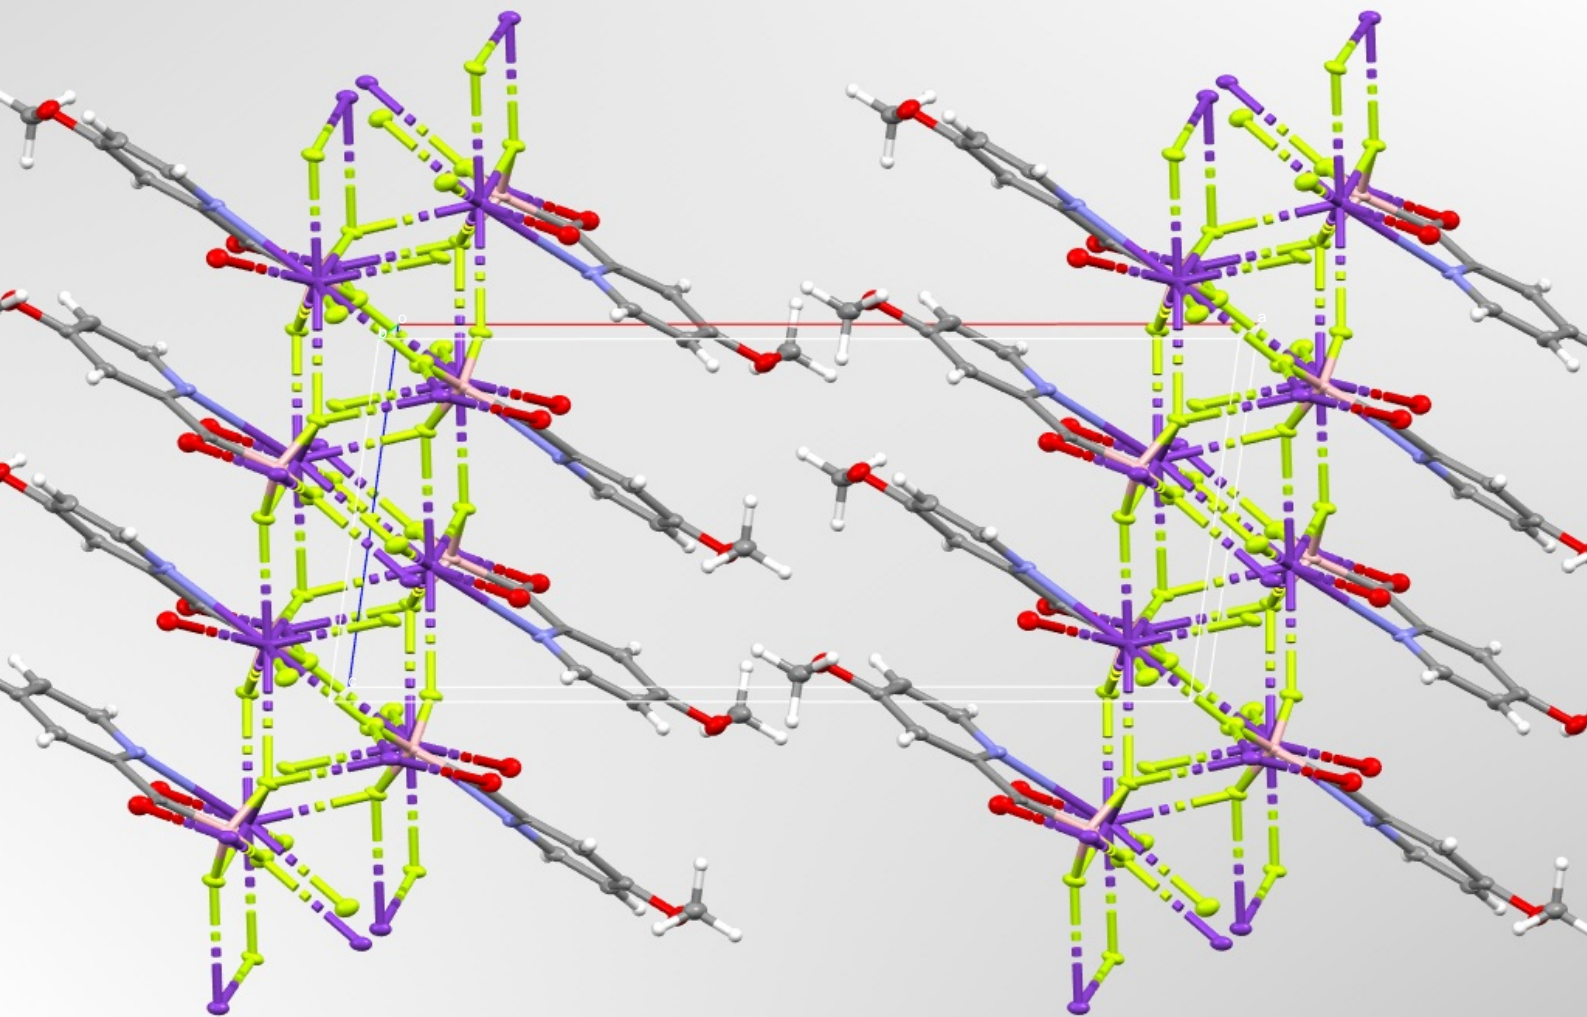

Supplement: Supplementary file 8 [file 31086607]

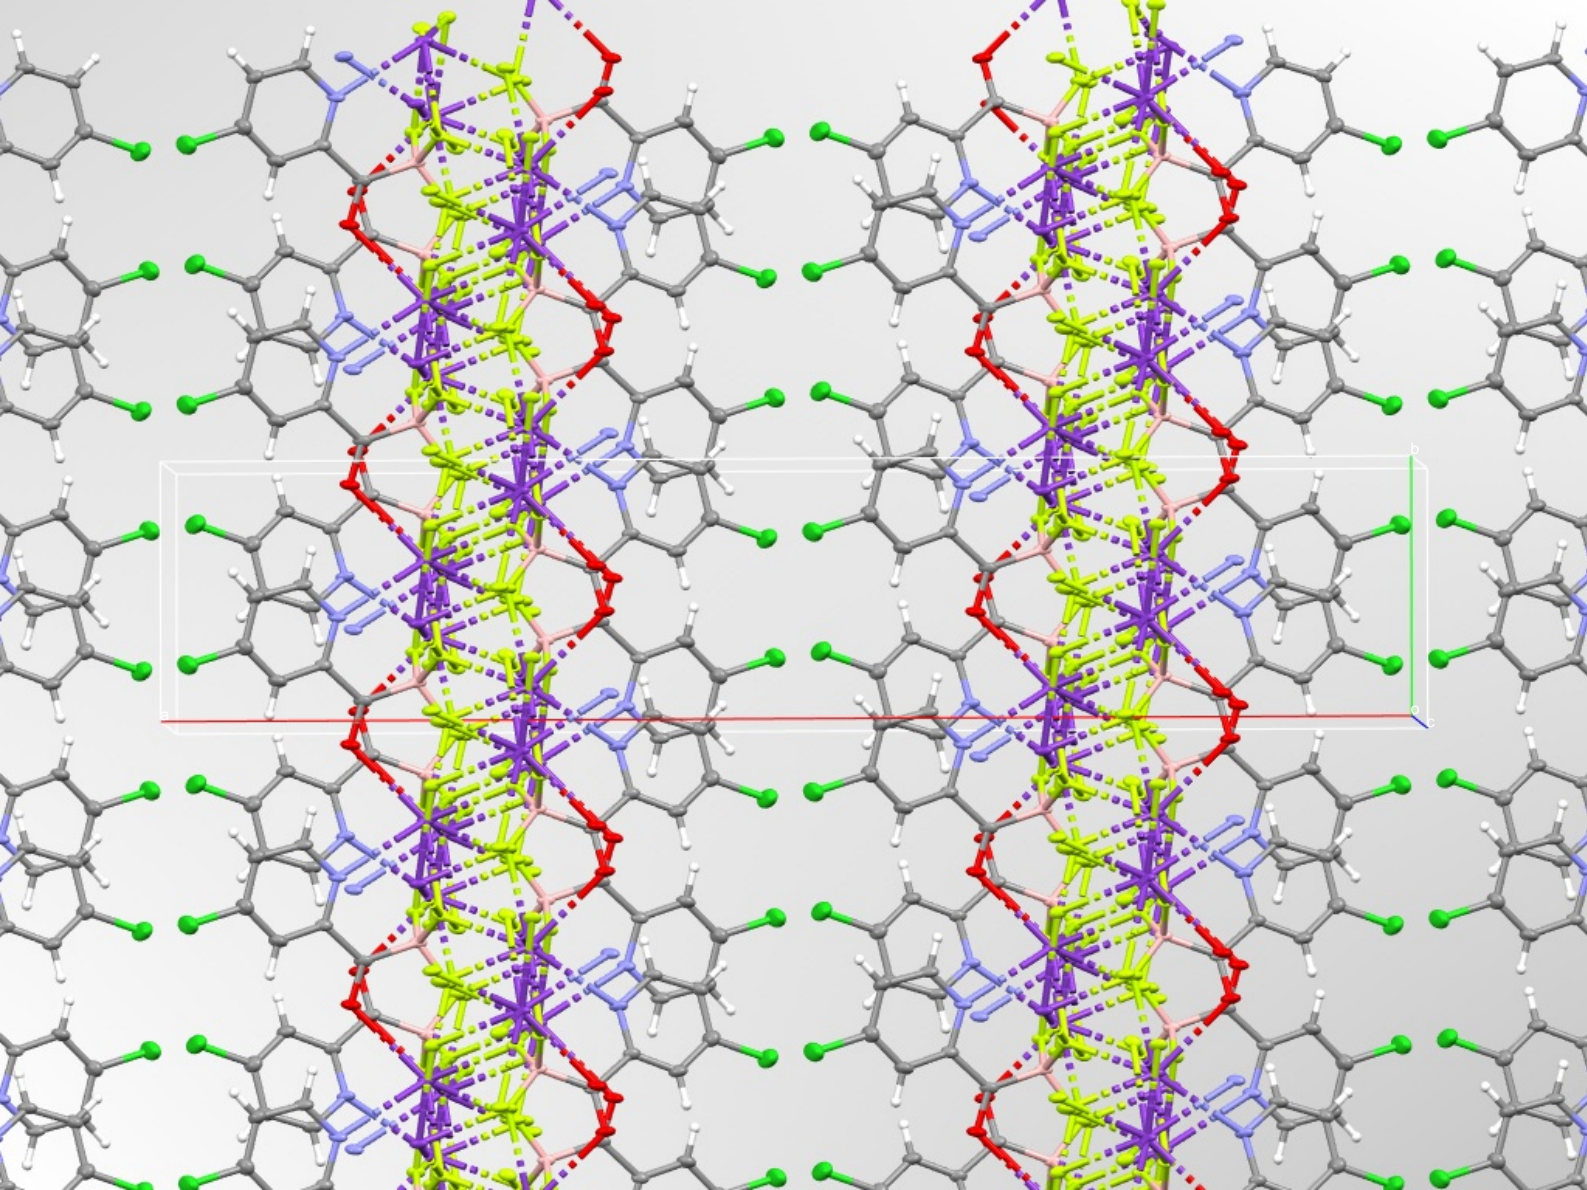

Supplement: Supplementary file 10 [file 31086607]

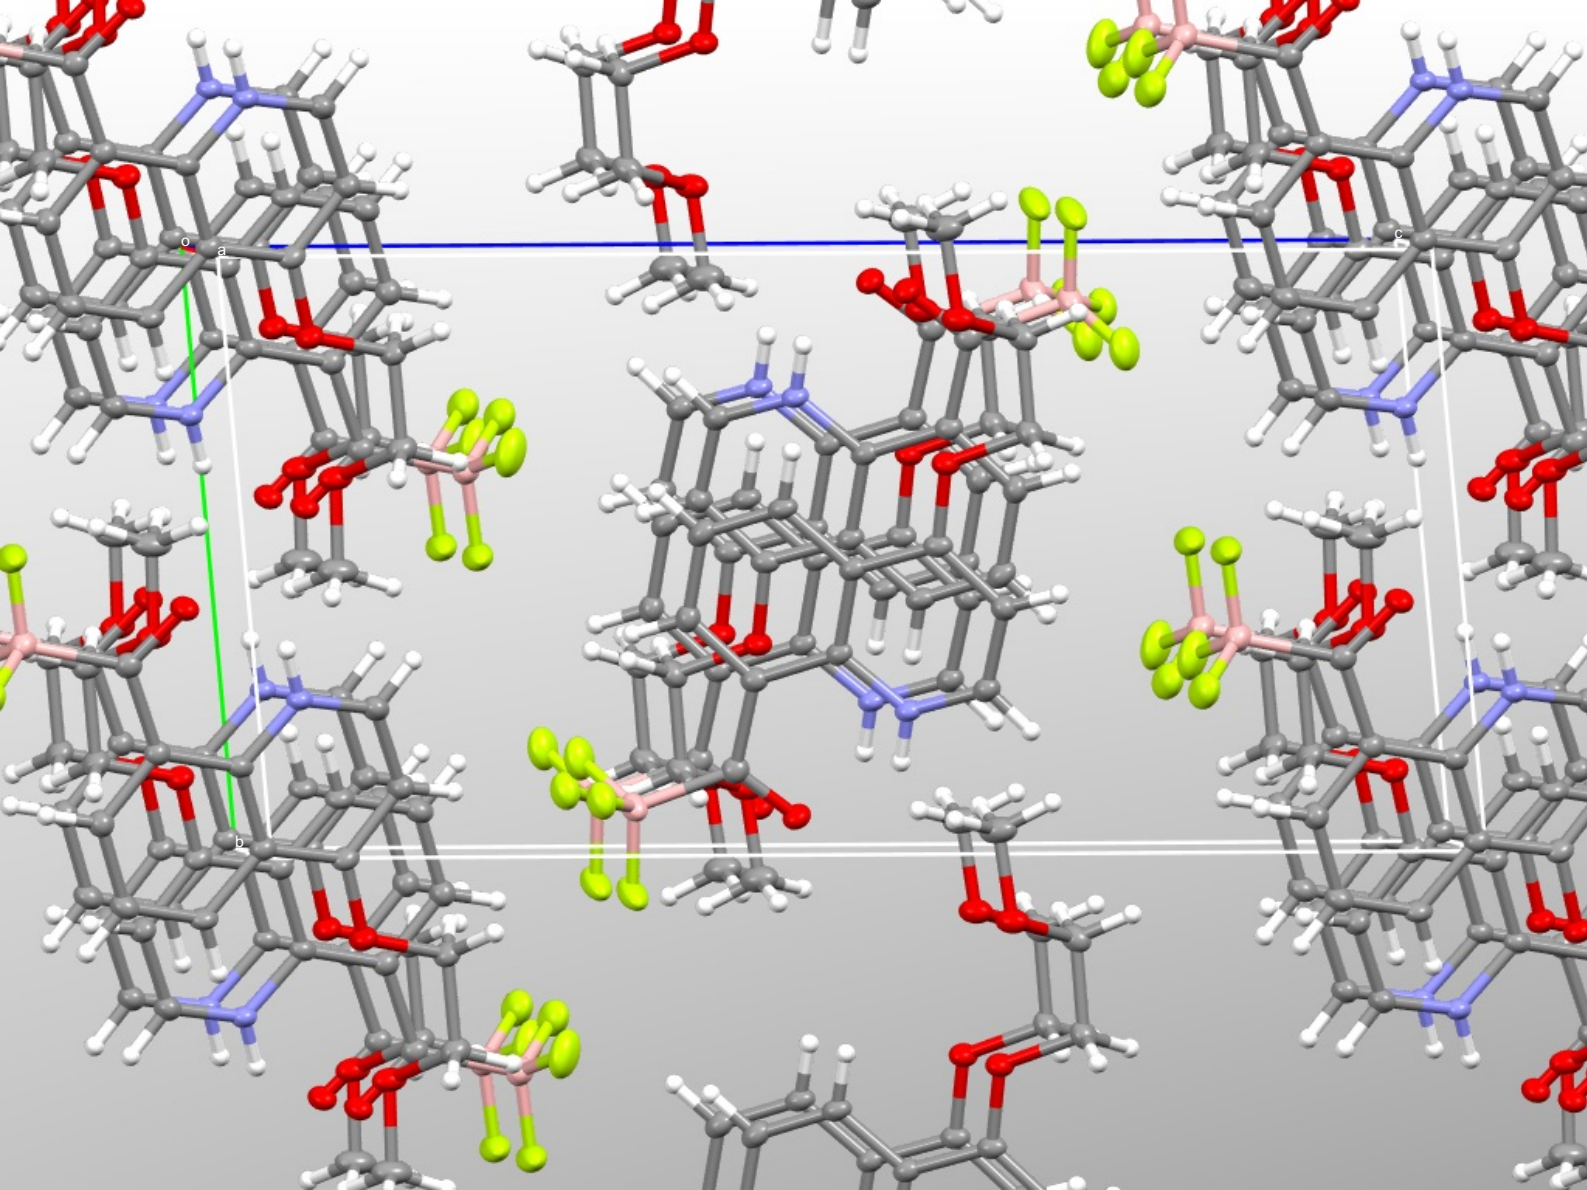

Supplement: Supplementary file 11 [file 31086607]

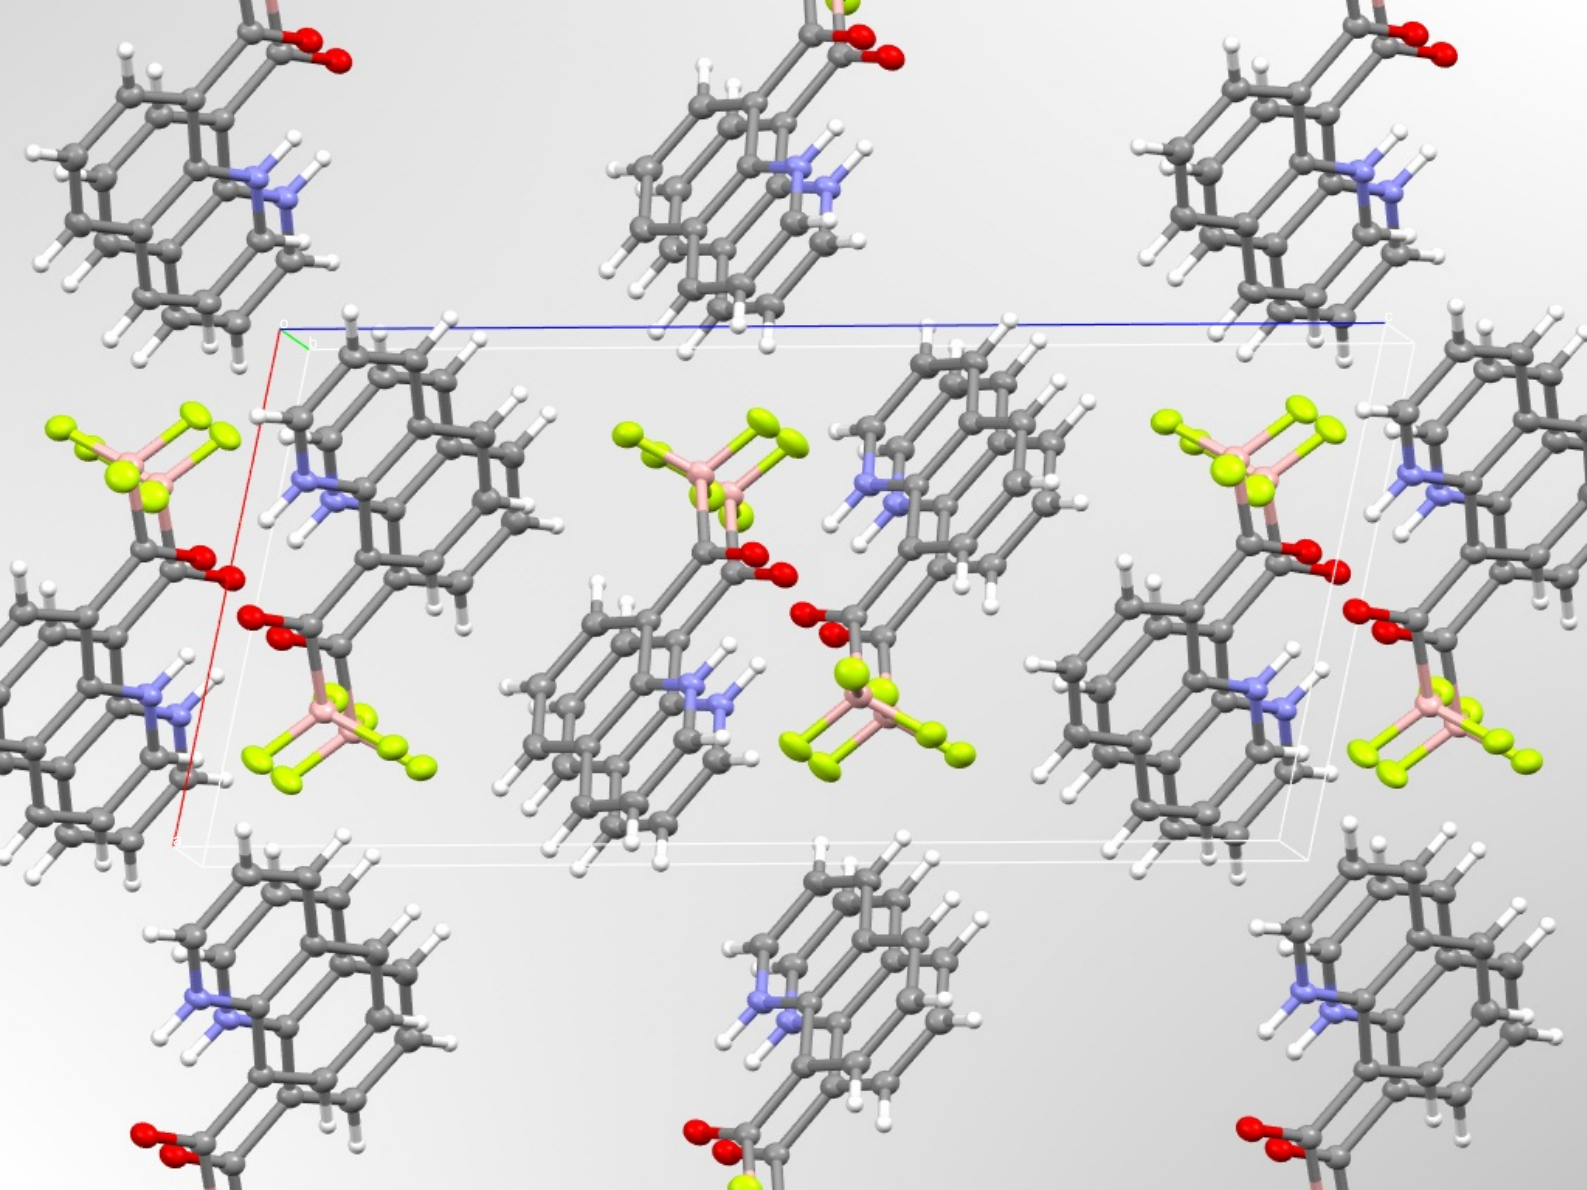

Supplement: Supplementary file 13 [file 31086607]

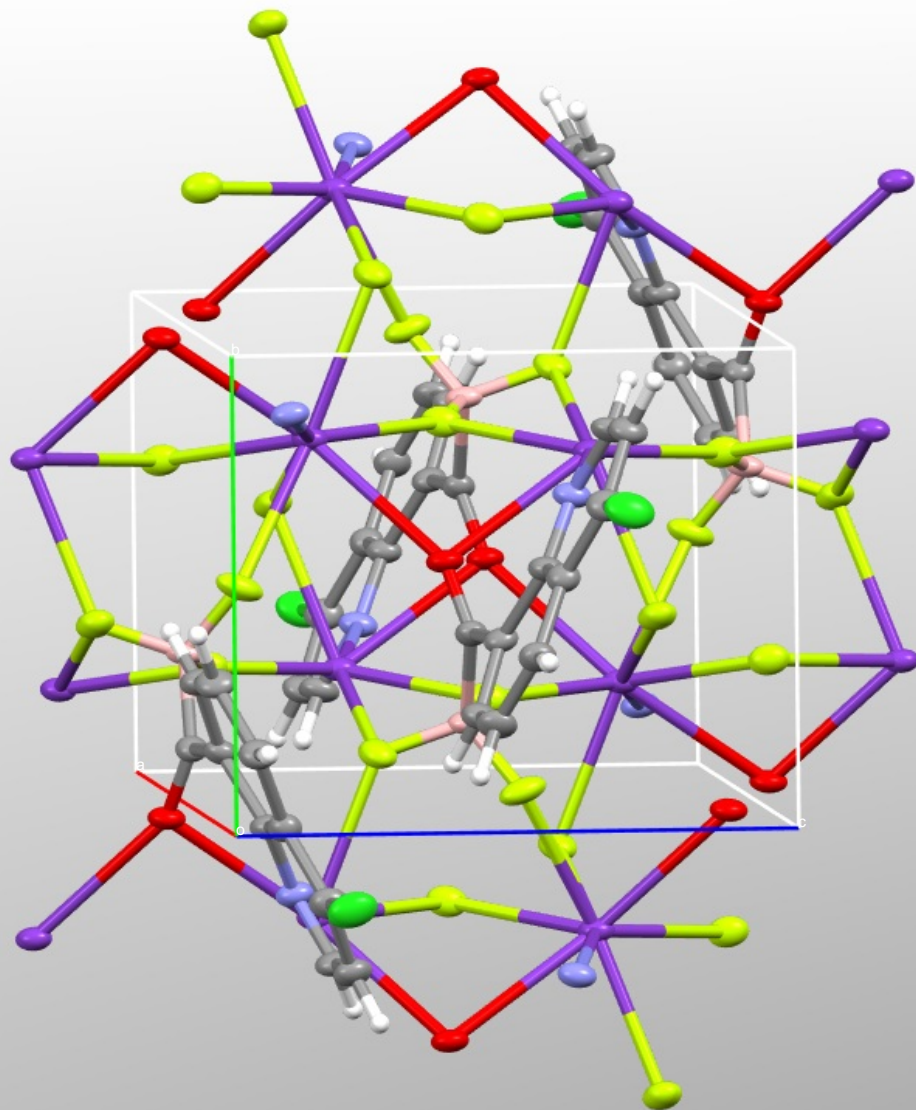

Supplement: Supplementary file 15 [file 31086607]
